# Supplementary material
Source: ML conference proceedings conference paper supplement (https://openreview.net/forum?id=N5YTixK4F1)
Supplement: supplementary_material [file attachment]

## A LIMITATIONS AND ETHICAL CONSIDERATIONS

As we employ Qwen-VL-chat as the baseline model for our research, our proposed model inherits certain limitations thereof. One such constraint is the upper limit on the number of input images. Within a sample, the sum count of ID images and test images can not surpass eight. Consequently, we opt to use keyframes as test images to effectively perform comprehension of movie segments. By integrating our visual instruction tuning with ID reference, if we fortify the baseline, which is anticipated to enhance overall performance.

Our method is related to person and instance ID, so we pay much attention when collecting data. Our tuning data and benchmark data mainly come from MovieNet, which is a open-source movie dataset, containing numerous shot images of actors, necessitating careful consideration about the copyright. Moreover, there exists the potential risk that our model or dataset may be utilized by others to engage in activities concerning a particular individual.

## B VISUAL INSTRUCTION TUNING DATA CONSTRUCTION

We construct dual-stage instruction tuning data with ID reference. The first stage data is constructed with predefined rules, cropping specific instances from test images, while the second stage data is generated by GPT-4V. Specifically, GPT-4V is utilized to produce four kinds of tuning datasets: single-image caption, multi-image caption, question-answer pair for a single image, and question-answer pair for multiple images. We present prompts for producing data in Table 7 and Table B. The constructed tuning data scale of two stages are shown in Table 9.

To preserve the innate proficiency of the baseline model, we integrate the instruction tuning dataset from LLaVA and ShareGPT4V with our compiled dataset. To simplify, we refer to these tuning data as the LLaVA dataset. As depicted in Table 10, we conduct an ablation study on the proportion of LLaVA dataset. The capability for ‘Matching’ reaches its best in the absence of LLaVA dataset, suggesting LLaVA data has no benefit for ‘Matching’. The location score is highest at a 20% inclusion rate of LLaVA data. In contrast, ‘Q&A’ and ‘Caption’ scores reach their optimal levels when the inclusion rate is set at 10%. This could imply that a judicious amount of LLaVA data serves to fortify foundational multimodal and text generation competencies. However, an excessive infusion of LLaVA data seems to hinder the learning of ID recognition. Therefore, we select 10% as the mixing rate of LLaVA data.

## C MM-ID

During MM-ID construction, we annotate questions and standard answers manually. The instructions for annotators are shown in Table C. We have four annotators for answer annotations. We conduct a quantitative evaluation of inter-annotator agreement on ‘Q&A’ and ‘Caption’ sub-tasks, which need annotated answers. CLIP text embeddings are used to measure the similarities of answers from four annotators. We calculate mean value of each pair’s similarity in four annotated answers. The agreement value distribution is shown in Table 12 and 13.

It is a challenge to evaluate accuracy of the model on ‘Q&A’ and ‘Caption’ sub-tasks. We utilize GPT-4 to score the predictions under the condition of provided questions and correct answers. We propose GPT-4 absolute and relative scoring strategies with designed prompts, as depicted in Table C. We sample our model’s answers on 100 MM-ID samples and score them both manually and using GPT-4. The correlation between the two sets of scores was very high, reaching 0.83 on Spearman coefficient.

The calculate process of relative score is as follows: GPT-4 gives two scores (10 points) for predictions from different models respectively. We compute mean value of scores for each model, then calculate the ratio of the average scores as the final relative score.

## D EXPERIMENT SETTINGS

To promote the evaluation of models on MM-ID tasks, we craft specific prompts to instruct models in accurately identifying character IDs. The prompts tailored for closed-source APIs are detailed

756  
757  
758  
759  
760  
761  
762  
763  
764  
765  
766  
767  
768  
769  
770  
771  
772  
773  
774  
775  
776  
777  
778  
779  
780  
781  
782  
783  
784  
785  
786  
787  
788  
789  
790  
791  
792  
793  
794  
795  
796  
797  
798  
799  
800  
801  
802  
803  
804  
805  
806  
807  
808  
809

Table 7: Prompts for GPT-4v to annotate ‘Caption’ instruction tuning data based on MovieNet.

#### Description generation for a single test image

You are a helpful and precise assistant for providing a description for an appropriate image. User will give an image and the image size (width, height). Then user will give some character names and their position in the image. The position is expressed with bounding box, which is the person’s left-top corner coordinates and right-bottom corner coordinates (left, top, right, bottom).

Firstly, you need to judge if it is appropriate. An appropriate image should be clear, should be easy for you to give a caption, the people in it should be easy to recognize.

If the image is not appropriate, you should answer ‘no’, if it is appropriate, you should give an accurate description of the image with given character names according to the following rules.

Different characters will be split by ‘\n’, you must remember the right people in the right position. Maybe there are some other people without name in the image, your caption need to contain them if necessary, but the main subject should be about characters with names.

The description should be accurate and brief. The answer should be less than 60 words.

Please pay more attention to people’s action. Your answer should be only about the visual content, don’t include your own speculation.

Then you should give an accurate description of the image with given character names.

#### Description generation for multiple test images

You are a helpful and precise assistant for providing a description for some continuous images. You can treat it as video caption generation. You need give an overall story description for these images according to the following rules.

User will give the image size (width, height) and some images. For each image, user will give some character names and their positions in the image. The position is expressed with bounding box, which is the person left-top corner coordinates and right-bottom corner coordinates (left, top, right, bottom).

Different characters will be split by ‘\n’, you must remember the right people in the right position. Maybe there are some other people without name in the image, your caption need contain them if necessary, but the main subject should be about characters with names.

The description should be accurate and brief. The answer should be less than 60 words.

Please pay more attention to people’s action. Your answer should be in accordance with temporal order of the images. Your description should be coherent and have some logical connections. Your answer should be only about the visual content, don’t include your own speculation.

You should describe the changes in the characters’ states and interactions throughout the entire images sequence as much as possible, avoiding fragmented descriptions for each individual image. Especially refrain from using phrases like ‘in the image 1’ and so on.

Then you should give an accurate and brief description of the images with given character names.

A good example: ‘Carol watches as Hal, in a white tank top, looks at his shirt. As she approaches, they engage in a close conversation, and eventually, Hal looks at Carol while gesturing, continuing their discussion.’

Table 8: Prompts for GPT-4v to annotate ‘Q&amp;A’ instruction tuning data based on MovieNet.

**Q&A generation for a single test image**

You are a helpful and precise assistant for providing a question-answer pair of an image with given character names.

User will give an image and the image size (width, height). Then user will give some character names and their position in the image. The position is expressed with bounding box, which is the person left-top corner coordinates and right-bottom corner coordinates (left, top, right, bottom).

Firstly, you need to judge if it is appropriate. An appropriate image should be clear, should be easy for you to give a caption, the people in it should be easy to recognize.

If the image is not appropriate, you should answer ‘no’, if it is appropriate, you should give a question-answer pair of the image with given character names according to following rules.

Different characters will be split by ‘\n’, you must remember the right people in the right position.

Then you should give a pair of question and corresponding answer about the image with given character names. The question and answer should be split by ‘\n’.

The question asks about the given character, including character actions, character attributes (clothes, expression, etc), character locations, relative relationship between characters, etc. Only include questions that have definite answers. Some examples of question templates: What is xxx doing? What color is xxx’s clothes?

The question and answer should be accurate and brief. The answer should be strictly correspond to the question and be less than 30 words.

**Q&A generation for multiple test images**

You are a helpful and precise assistant for providing a question-answer pair for some continuous images with given character names. You can treat it as video question answering generation. You need give an overall question and answer for these images according to the following rules.

User will give the image size (width, height) and some images. For each image, user will give some character names and their positions in the image. The position is expressed with bounding box, which is the person left-top corner coordinates and right-bottom corner coordinates (left, top, right, bottom).

Different characters will be split by ‘\n’, you must remember the right people in the right position.

Then you should give a pair of question and corresponding answer about the images with given character names. The question and answer should be split by ‘\n’.

The question asks about one of or some given characters, including character actions, character attributes (clothes, expression, etc), relative relationship between characters, etc. Only include questions that have definite answers.

The question and answer should be accurate and brief. The answer should be strictly correspond to the question and be less than 30 words.

You should focus on the changes in the characters’ states, actions or interactions throughout the entire images sequence as much as possible, avoiding fragmented question for each individual image. Especially refrain from using phrases like ‘in the image 1’ and so on.

A good example: ‘What is Timmy doing?\nTimmy walks into the room, then has a conversation with another man, finally they hug each other excitedly.’

Table 9: ID recognition instruct-tuning dataset.

| Stage                   | tuning data          | data scale |
|-------------------------|----------------------|------------|
| <b>The first stage</b>  | VCR                  | 30k        |
|                         | RefCoco              | 20k        |
|                         | Flickr30k            | 30k        |
| <b>The second stage</b> | Matching             | 4k         |
|                         | Location             | 12k        |
|                         | Single-image Q&A     | 15k        |
|                         | Single-image Caption | 15k        |
|                         | Multi-image Q&A      | 4k         |
|                         | Multi-image Caption  | 10k        |

Table 10: The ablation study about instruction tuning data of LLaVA.

| Model                 | Matching     | Location     | Q&A         | Caption     |
|-----------------------|--------------|--------------|-------------|-------------|
| Ours (w/o LLaVA data) | <b>0.746</b> | 0.797        | 5.27        | 4.98        |
| Ours (10% LLaVA data) | 0.716        | 0.821        | <b>5.71</b> | <b>5.15</b> |
| Ours (20% LLaVA data) | 0.716        | <b>0.829</b> | 5.67        | 5.11        |

in Table D. and prompts for open-source models are designed similarly. We try multiple prompts for models to complete instructions, but none achieves satisfactory results, which demonstrates ID awareness can not be unleashed only by prompt engineering.

## E MORE VISUALIZATION

In this section, we present more qualitative results of IDA-VLM, as shown in Figure 7, Figure 8, Figure 9, Figure 10.

## F INFLUENCE OF ID IMAGE NUMBER

In actual movie understanding, characters of interest may not be in the test images, so the model’s performance in scenarios with additional reference IDs is worth an investigation. In some samples of MM-ID, we give more ID images than characters appearing in the test image. As shown in Figure 11, in some easy Q&A samples, IDA-VLM can give right answers, but in caption sub-task, IDA-VLM may generate content of non-existing characters. This is because in our training data, the number of ID images generally equals to the character count in test images. If we add additional ID images to the training samples, this issue can be resolved.

## G ROBUSTNESS TO ID VARIATIONS

In our test samples, the ID images are clear, enabling the model to capture complete identity characteristics. The test images exhibit various ID variations, including pose and clothing changes, demonstrating our model’s robustness to identity variations. As shown in Figure 12, we showcase model performance under different ID variations. We investigate ID variations across three aspects: clothing, viewing angle, and lighting. The model demonstrates the highest robustness to clothing variations. For the other two aspects, we present one successful case and one failure case each. The model’s performance degrades when encountering substantial changes in viewing angles, presence of occlusions, or poor lighting conditions. Moreover, the primary challenge arises from interference by IDs with similar features in the test images.

918  
919  
920  
921  
922  
923  
924  
925  
926  
927  
928  
929  
930  
931  
932  
933  
934  
935  
936  
937  
938  
939  
940  
941  
942  
943  
944  
945  
946  
947  
948  
949  
950  
951  
952  
953  
954  
955  
956  
957  
958  
959  
960  
961  
962  
963  
964  
965  
966  
967  
968  
969  
970  
971

Table 11: The instructions for Annotators.

Design Questions: The questions are about specific characters in one or more images. These questions require the model to correctly identify specific persons to provide right answers, such as inquiring about someone’s states, actions, attributes, positions, etc. Consider more angles for asking questions. The questions should involve ID awareness of models. For example, people in the test image have different actions, so you can ask about someone’s action to evaluate whether the model recognize the identity correctly.

Annotate Answers for Q&A and Descriptive Types of Questions: Answers to Q&A types of questions need to be accurate based on the character. Descriptive questions only require a correct description, as detailed as possible. Besides each person’s action and state, include some simple background descriptions as well.

Table 12: The inter-annotator agreement distribution on ‘Q&A’ sub-task. The mean similarity is 0.9106.

| Similarity | >0.9  | 0.8-0.9 | <0.8 |
|------------|-------|---------|------|
| proportion | 55.2% | 40.0%   | 4.8% |

Table 13: The inter-annotator agreement distribution on ‘Caption’ sub-task. The mean similarity is 0.6822.

| Similarity | >0.8  | 0.7-0.8 | 0.6-0.7 | 0.5-0.6 | <0.5 |
|------------|-------|---------|---------|---------|------|
| proportion | 22.5% | 28.2%   | 37.3%   | 9.9%    | 2.1% |

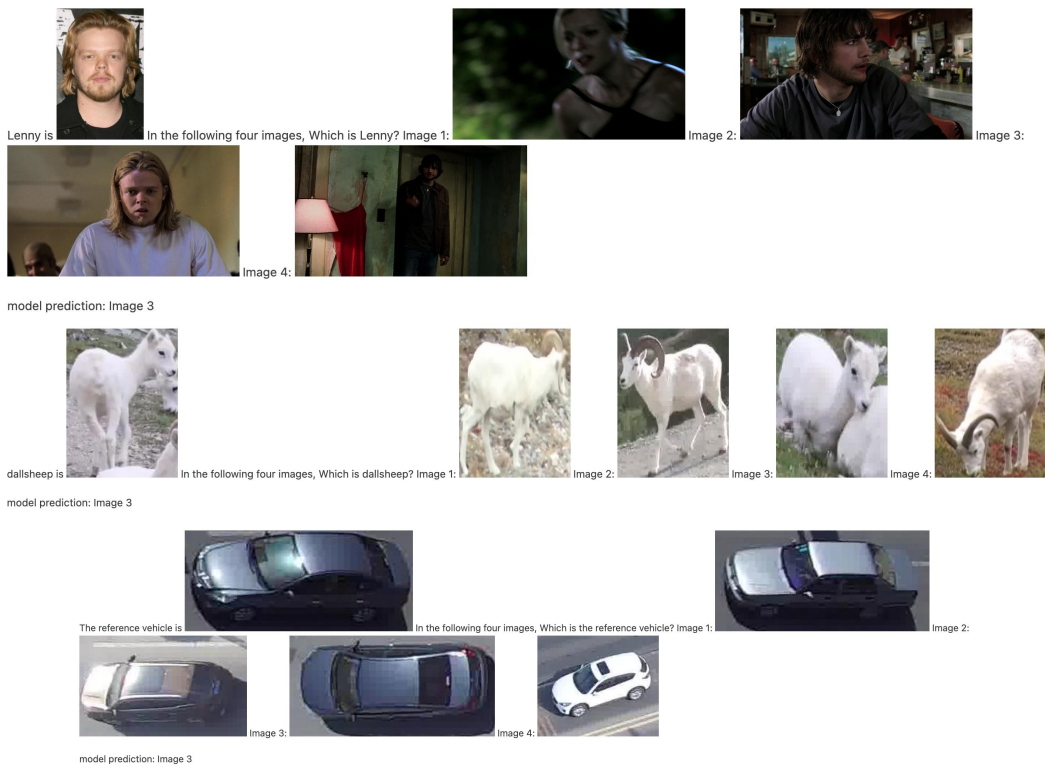

Figure 7: Samples of Matching sub-task.

Table 14: The prompts for evaluating with GPT-4 on MM-ID.

**Absolute Score**

You are a helpful and precise assistant for evaluating answers. We would like to request your feedback on the quality of an AI assistant’s answer according to the given question and ground truth. The question, answer of AI assistant and ground truth will be signed by ‘question’, ‘prediction’ and ‘GT’. You need to judge whether the overall meanings of prediction and ground truth answer are consistent or not. Please pay more attention to the correspondence of character names and their states or actions. Please rate the helpfulness, relevance, accuracy of the responses. You should give an overall score on a scale of 1 to 10, where a higher score indicates better overall performance. Please first output a single line containing only one value indicating the score for Assistant answer. In the subsequent line, please provide a comprehensive explanation of your evaluation, avoiding any potential bias and ensuring that the order in which the responses were presented does not affect your judgment.

**Relative Score**

We would like to request your feedback on the performance of two AI assistants in response to the user question according to the given ground truth. The question, ground truth answer and predictions of two AI assistants will be signed by ‘question’, ‘GT’, ‘prediction 1’ and ‘prediction 2’. Please rate the helpfulness, relevance, accuracy, level of details of their responses. Each assistant receives an overall score on a scale of 1 to 10, where a higher score indicates better overall performance. Please pay more attention to the correspondence of character names and their states or actions. Please first output a single line containing only two values indicating the scores for Prediction 1 and 2, respectively. The two scores are separated by a space. In the subsequent line, please provide a comprehensive explanation of your evaluation, avoiding any potential bias and ensuring that the order in which the responses were presented does not affect your judgment.

Table 15: The prompts for closed-source APIs testing on MM-ID.

**Matching, Q&A, Caption (GPT-4V, Gemini-pro, QwenVL-Plus, QwenVL-Max)**

You are a helpful and precise assistant for providing a answer to the question. You need recognize instance identity to answer questions about reference characters or give a caption with character names (for multiple continuous images). You must provide an exact answer.

**Location (GPT-4V, Gemini-pro)**

You need to give coordinates of bounding box of some given characters or objects. The answer form should be ‘bbox: [x1, y1, x2, y2].’, where x1 is left side of bounding box, y1 is upper side, x2 is right side, y2 is bottom side, they are all integers.

**Location (QwenVL-Plus, QwenVL-Max)**

You need to give coordinates of bounding box of one given character or object. The answer form should only be ‘<ref>xxx</ref><box>(x1,y1),(x2,y2)</box>.’, where x1 is left side of bounding box, y1 is upper side, x2 is right side, y2 is bottom side, they are all integers.



1026  
1027  
1028  
1029  
1030  
1031  
1032  
1033  
1034  
1035  
1036  
1037  
1038  
1039  
1040  
1041  
1042  
1043  
1044  
1045  
1046  
1047  
1048  
1049  
1050  
1051  
1052  
1053  
1054  
1055  
1056  
1057  
1058  
1059  
1060  
1061  
1062  
1063  
1064  
1065  
1066  
1067  
1068  
1069  
1070  
1071  
1072  
1073  
1074  
1075  
1076  
1077  
1078  
1079

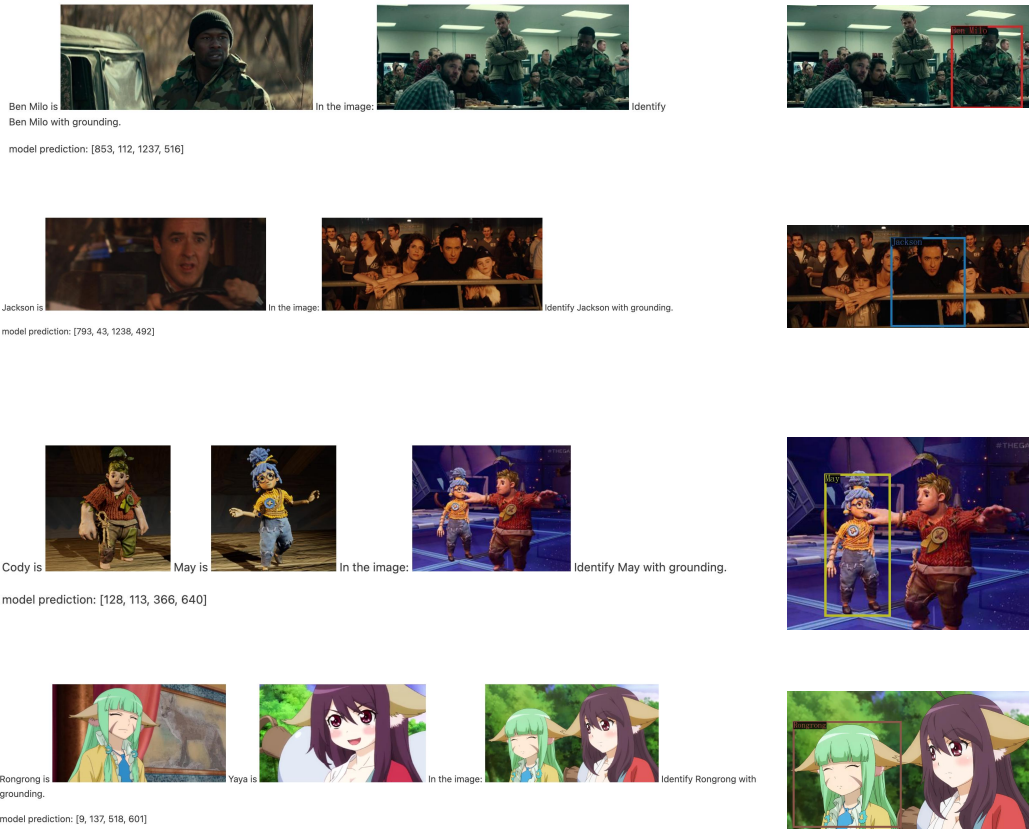

Figure 8: Samples of Location sub-task.

1080  
1081  
1082  
1083  
1084  
1085  
1086  
1087  
1088  
1089  
1090  
1091  
1092  
1093  
1094  
1095  
1096  
1097  
1098  
1099  
1100  
1101  
1102  
1103  
1104  
1105  
1106  
1107  
1108  
1109  
1110  
1111  
1112  
1113  
1114  
1115  
1116  
1117  
1118  
1119  
1120  
1121  
1122  
1123  
1124  
1125  
1126  
1127  
1128  
1129  
1130  
1131  
1132  
1133

Mrs. Fairfax is  Jane is  In the image:  What color is Jane's dress?  
model prediction: Jane's dress is blue.

Hibiki Shimada is  Megumi Chigusa is  In the image:  Who is holding a cylinder object?  
model prediction: Megumi Chigusa is holding a cylinder object.

Aniya is  Cizi is  In the image:  What is Cizi's emotion?  
model prediction: Cizi is angry.

Heizi is  Leizi is  Chuchun is  In the image:  What is Chuchun doing?  
model prediction: Chuchun is pushing Heizi in a wheelchair.

Figure 9: Samples of Q&A sub-task.



1134  
1135  
1136  
1137  
1138  
1139  
1140  
1141  
1142  
1143  
1144  
1145  
1146  
1147  
1148  
1149  
1150  
1151  
1152  
1153  
1154  
1155  
1156  
1157  
1158  
1159  
1160  
1161  
1162  
1163  
1164  
1165  
1166  
1167  
1168  
1169  
1170  
1171  
1172  
1173  
1174  
1175  
1176  
1177  
1178  
1179  
1180  
1181  
1182  
1183  
1184  
1185  
1186  
1187

Ron is 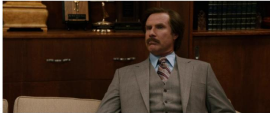 Brick is  Explain the content of this image: 

model prediction: Ron on the left, holding a can, gestures with his right hand raised. Brick, sitting to the right, wears a patterned suit and looks ahead. They appear to be in an indoor setting with blinds partially closed behind them.

Kosaku is  Shimada is  For the image: 

Give a description.

model prediction: Kosaku stands offering a plastic cup to Shimada, who is seated on a red bench in a dimly lit room with other seating areas and office spaces in the background.

Tom Sawyer is  Huck Finn is  In the following images 

   give a description.

model prediction: Tom Sawyer and Huck Finn walk together through a rustic landscape, with Tom leading the way. They then rush towards something off-screen, with Tom slightly ahead. Subsequently, they stand face to face, seemingly in a serious conversation. Finally, they peek through a barred window together, peering inside cautiously.

Claude Verneuil is  Marie Verneuil is  What is displayed in these images 

 

model prediction: Marie Verneuil enters the room where Claude Verneuil is working at his desk. They stand facing each other, and Claude extends his hand towards Marie, possibly initiating a handshake. Subsequently, they move to a sunny outdoor setting, where Claude sits with his arm around Marie, suggesting a comforting or intimate gesture as they engage in a conversation.

Figure 10: Samples of Caption sub-task.

1188  
1189  
1190  
1191  
1192  
1193  
1194  
1195  
1196  
1197  
1198  
1199  
1200  
1201  
1202  
1203  
1204  
1205  
1206  
1207  
1208  
1209  
1210  
1211  
1212  
1213  
1214  
1215  
1216  
1217  
1218  
1219  
1220  
1221  
1222  
1223  
1224  
1225  
1226  
1227  
1228  
1229  
1230  
1231  
1232  
1233  
1234  
1235  
1236  
1237  
1238  
1239  
1240  
1241

sample 237:

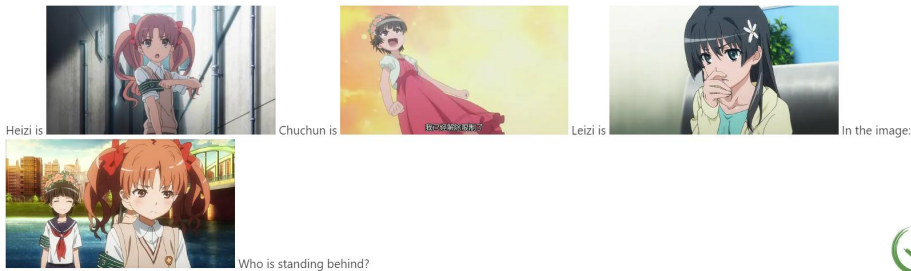

sample 259:

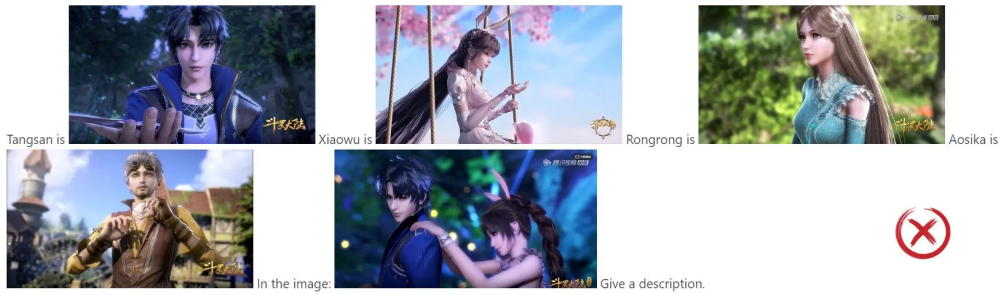

Figure 11: Samples containing additional ID images.

1242  
1243  
1244  
1245  
1246  
1247  
1248  
1249  
1250  
1251  
1252  
1253  
1254  
1255  
1256  
1257  
1258  
1259  
1260  
1261  
1262  
1263  
1264  
1265  
1266  
1267  
1268  
1269  
1270  
1271  
1272  
1273  
1274  
1275  
1276  
1277  
1278  
1279  
1280  
1281  
1282  
1283  
1284  
1285  
1286  
1287  
1288  
1289  
1290  
1291  
1292  
1293  
1294  
1295

sample 11:

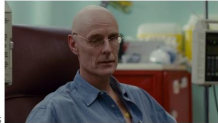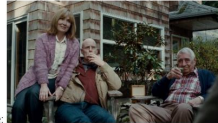

Mitch is In the image: What color is Mitch's clothes?

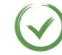

sample 130:

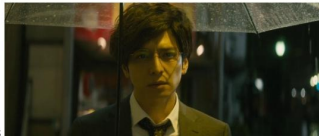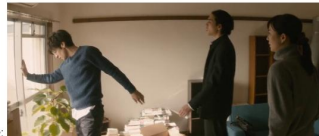

Kosaku Ito is In the image: Identify Kosaku Ito with grounding.

Model prediction: Kosaku Ito(46,191),(450,996)

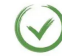

(a) clothing

sample 5:

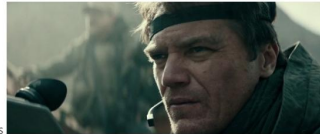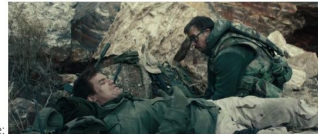

Hal Spencer is In the image: How is his state?

Model prediction: Hal Spencer is lying on the ground, seemingly injured or resting.

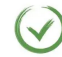

sample 239:

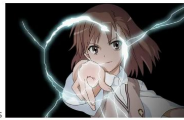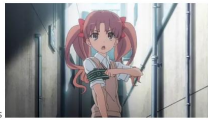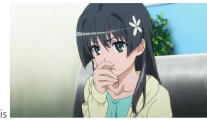

Meiqin is Heizi is Leizi is Chuchun is

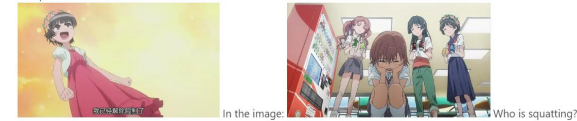

Model prediction: Leizi is squatting

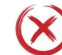

(b) angle

sample 100:

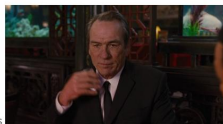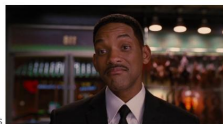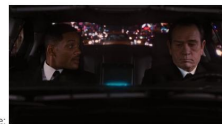

Agent K is grounding. Agent J is In the image: Identify Agent K with

Model prediction: Agent K(583,100),(969,705)



sample 6:

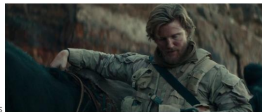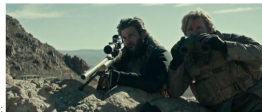

Vern is In the image: What is Vern doing?

Model prediction: Vern is aiming a rifle while crouched down on rocky terrain

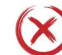

(c) lighting

Figure 12: Model robustness to ID variations.
